# Supplementary material for: SIN-3 as a key determinant of lifespan and its sex dependent differential role on healthspan in Caenorhabditis elegans
Source: publisher site journal article supplement (doi:10.18632/aging.101682), 2018-12-12
Supplement: Supplementary file [file aging-v10i12-101682-supplementary-material-SD2.pdf]

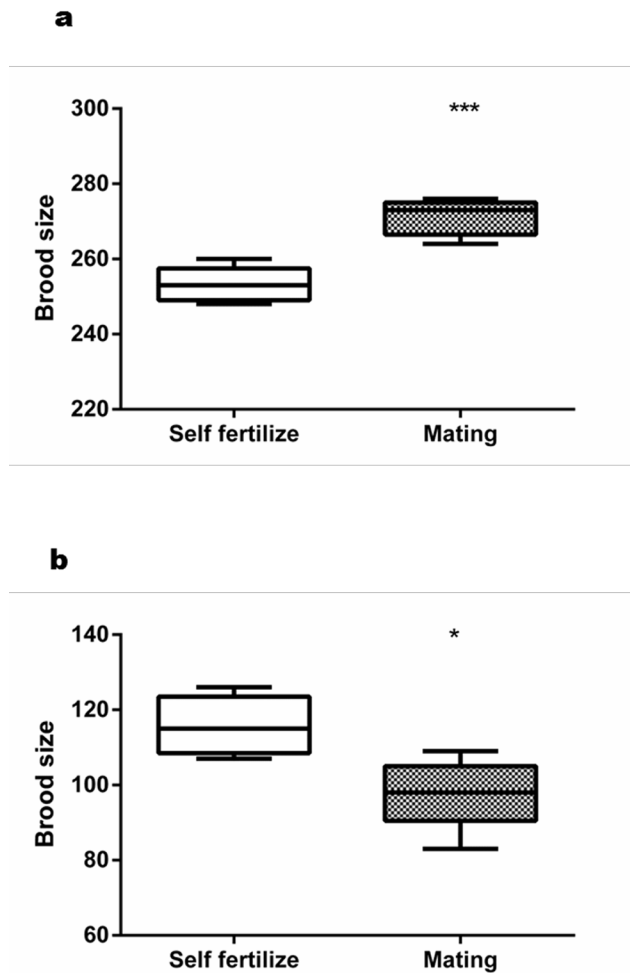

**Figure S2. *sin-3* deletion causes reduction in the brood size.** (a) *him-5(e1490)* hermaphrodite lays significantly greater number of eggs after mating as compared to self-fertilization. (b) *sim-3;him-5* hermaphrodite lays significantly reduced number of eggs after mating as compared to self-fertilization. (\*\* $P < 0.05$ ; \*\*\* $P < 0.001$  and denotes the comparison with respect to self-fertilized brood size; paired Student's t-test performed). At least 30 hermaphrodites per strain were evaluated and the experiment was repeated thrice.
