# Supplementary material for: SIN-3 as a key determinant of lifespan and its sex dependent differential role on healthspan in Caenorhabditis elegans
Source: publisher site journal article supplement (doi:10.18632/aging.101682), 2018-12-12
Supplement: Supplementary file [file aging-v10i12-101682-supplementary-material-SD3.pdf]

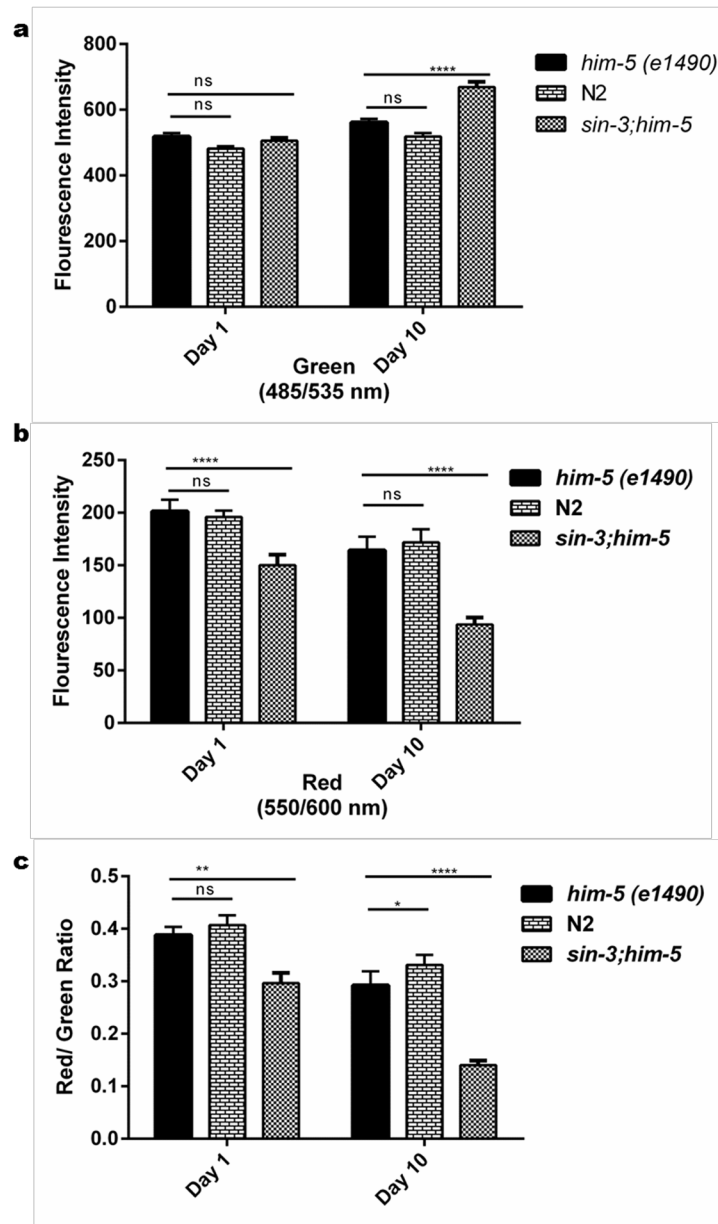

**Figure S3. *sin-3* deletion causes decline in mitochondrial health.** (a) *sin-3;him-5* worms show enhanced green fluorescence at day 10 as compared to *him-5(e1490)* and N2. (b) *sin-3;him-5* worms have lower red fluorescence at day 1 and day 10 as compared to *him-5(e1490)* and N2. (c) With age the ratio of red/green fluorescence is highly perturbed in *sin-3;him-5* worms as compared to the isogenic and wild-type worms (ns = non-significant; \* $P < 0.05$ ; \*\* $P < 0.01$ ; \*\*\*\* $P < 0.001$  and denotes the comparison with respect to self-fertilized brood size; two way ANOVA performed). The experiment was repeated thrice.
