# Supplementary material for: SIN-3 as a key determinant of lifespan and its sex dependent differential role on healthspan in Caenorhabditis elegans
Source: publisher site journal article supplement (doi:10.18632/aging.101682), 2018-12-12
Supplement: Supplementary file [file aging-v10i12-101682-supplementary-material-SD4.pdf]

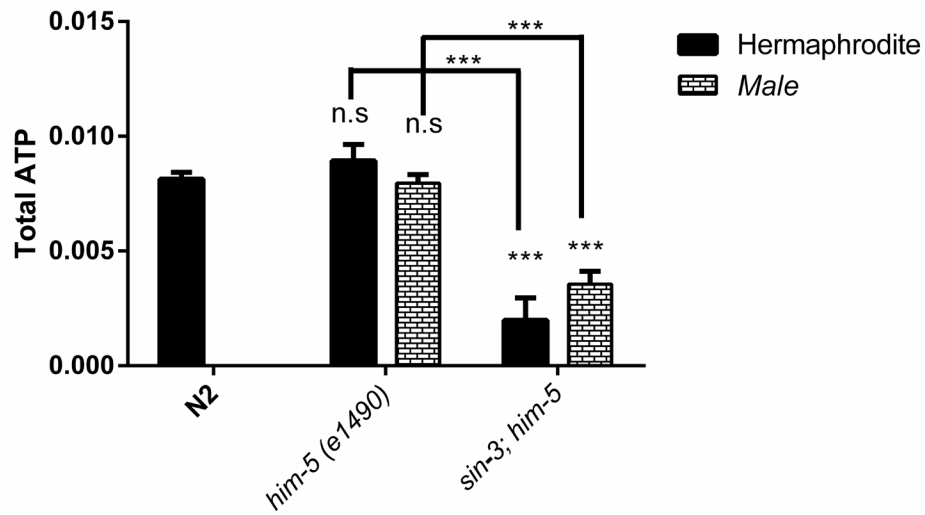

**Figure S4. Total ATP content in *sin-3(tm1279);him-5(e1490)* worms is significantly reduced in both hermaphrodite as well as male populations with respect to the isogenic strain at day 10.** (ns, non-significant; \*\* $P < 0.05$ ; \*\*\*\* $P < 0.001$  and denotes the comparison with respect to *him-5 (e1490)*; One-way ANOVA performed).
