# Supplementary material for: SIN-3 as a key determinant of lifespan and its sex dependent differential role on healthspan in Caenorhabditis elegans
Source: publisher site journal article supplement (doi:10.18632/aging.101682), 2018-12-12
Supplement: Supplementary file [file aging-v10i12-101682-supplementary-material-SD6.pdf]

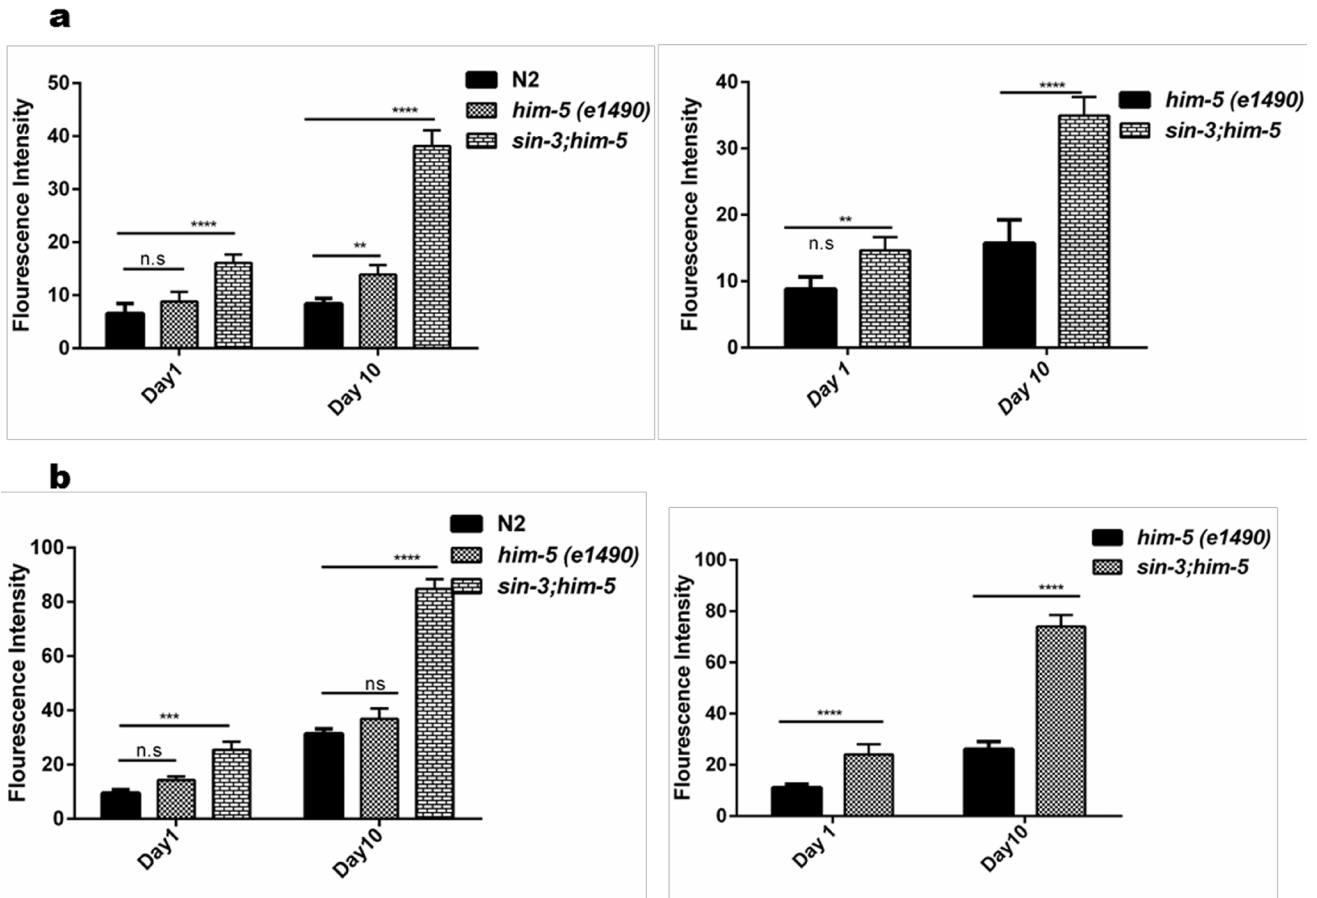

**Figure S6. *sin-3* deletion causes accumulation of lipids and age associated death pigment lipofuscin.** (a) *sin-3;him-5* worms show enhanced accumulation of lipids at day 10 of adulthood w.r.t isogenic control and wild-type. Left and right panel denotes the quantitative accumulation in hermaphrodites and males respectively. (b) *sin-3;him-5* worms show enhanced accumulation of lipofuscin at day 10 of adulthood w.r.t isogenic control and wild-type. Left and right panel denotes the quantitative accumulation in hermaphrodites and males respectively (ns = non-significant; \* $P < 0.05$ ; \*\* $P < 0.01$ ; \*\*\*\* $P < 0.001$  and denotes the comparison with respect to self-fertilized brood size; Two way ANOVA performed). The experiment was repeated thrice.
