# Supplementary material for: SIN-3 as a key determinant of lifespan and its sex dependent differential role on healthspan in Caenorhabditis elegans
Source: publisher site journal article supplement (doi:10.18632/aging.101682), 2018-12-12
Supplement: Supplementary file [file aging-v10i12-101682-supplementary-material-SD7.pdf]

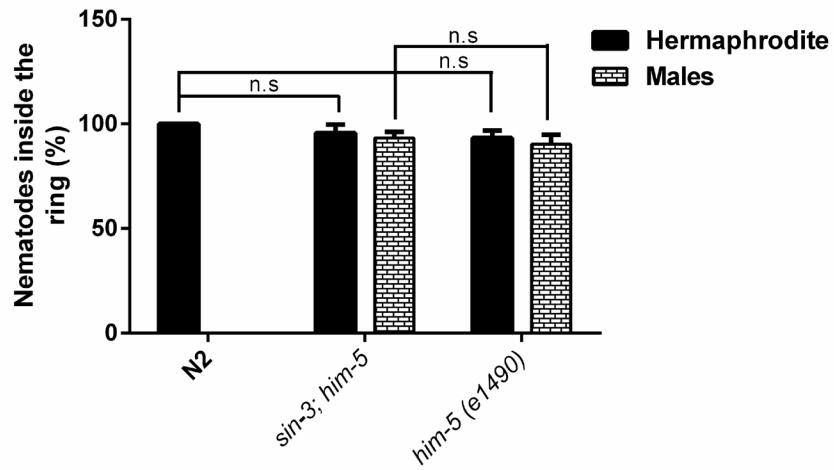

**Figure S7. *C. elegans* assessed for aversion behavior using 8M glycerol in ring assay.** The ability avoid high osmotic region was observed for all the strains. No significant difference observed. Each data point represents means  $\pm$  the standard error of three replicates. (n.s denotes non-significant. Statistical significance was calculated comparing single treatments.)
