# Supplementary material for: SIN-3 as a key determinant of lifespan and its sex dependent differential role on healthspan in Caenorhabditis elegans
Source: publisher site journal article supplement (doi:10.18632/aging.101682), 2018-12-12
Supplement: Supplementary file [file aging-v10i12-101682-supplementary-material-SD8.pdf]

## Supplementary Tables

**Supplementary Table S1. Decline in lifespan in *sin-3(tm1279);him-5(e1490)* worms compared to *him-5(e1490)* mutant worms.**

| Genotype                                       | Mean lifespan | % decline in mean lifespan | Maximum lifespan | % decline in maximum lifespan |
|------------------------------------------------|---------------|----------------------------|------------------|-------------------------------|
| <b>Hermaphrodite</b>                           |               |                            |                  |                               |
| <i>him-5(e1490)V</i>                           | 19            | N.A                        | 28               | N.A                           |
| <i>sin-3(tm1276)I;</i><br><i>him-5(e1490)V</i> | 10            | 47.37                      | 14               | 50                            |
| <b>Males</b>                                   |               |                            |                  |                               |
| <i>him-5(e1490)V</i>                           | 20            | N.A                        | 31               | N.A                           |
| <i>sin-3(tm1276)I;</i><br><i>him-5(e1490)V</i> | 11            | 45                         | 16               | 48.39                         |

**Supplementary Table S2. Comparative estimation of *sin-3* gene on various physiological parameters.**

| Phenotype              | % change observed in <i>sin-3;him5</i> (mutant genotype) hermaphrodite w.r.t isogenic control <sup>#</sup> | % change observed in dsRNAi against <i>sin-3</i> and empty vector L4440 on wild-type * |
|------------------------|------------------------------------------------------------------------------------------------------------|----------------------------------------------------------------------------------------|
| Life Span              | 47                                                                                                         | 47                                                                                     |
| Brood Size             | 37.5                                                                                                       | ~35.8                                                                                  |
| Body Length (YA stage) | 15                                                                                                         | ~12                                                                                    |
| AVID                   | 30                                                                                                         | ~27                                                                                    |

The data presented is mean of the three independent experiments. Please refer materials and methods for details. \* denotes that the dsRNAi treatment was carried out for three generations, following which the experiments were conducted.

**Supplementary Table S3. Loss of *sin-3* results in defective reproduction in the worms.**

| Genotype                            | No. of eggs | No. of animals hatched | % hatching | Number of male progeny | % males |
|-------------------------------------|-------------|------------------------|------------|------------------------|---------|
| <b>Self mating</b>                  |             |                        |            |                        |         |
| <i>him-5(e1490)V</i>                | 253         | 252.2                  | 99.68      | 116                    | 46      |
| <i>sin-3(tm1276)1;him-5(e1490)V</i> | 115         | 81.2                   | 70.60      | 30                     | 37.3    |
| <b>Mating</b>                       |             |                        |            |                        |         |
| <i>him-5(e1490)V</i>                | 271         | 268                    | 98.89      | 116                    | 43.59   |
| <i>sin-3(tm1276)1;him-5(e1490)V</i> | 101         | 74.6                   | 73.86      | 31                     | 37.5    |

**Supplementary Table S4. *sin-3* deletion results in increase body length.**

| Time after L4 (h) | <i>sin-3; him-5</i> (Hermaphrodite) |       | <i>him-5 (e1490)</i> (Hermaphrodite) |      |
|-------------------|-------------------------------------|-------|--------------------------------------|------|
|                   | Mean (µm)                           | SEM   | Mean (µm)                            | SEM  |
| 0                 | 812.33                              | 4.63  | 698.66                               | 2.02 |
| 24                | 1015.66                             | 3.38  | 878.33                               | 5.45 |
| 48                | 1378.00                             | 3.78  | 1031.00                              | 3.05 |
| 72                | 1621.00                             | 5.13  | 1233.66                              | 2.90 |
| 96                | 1858.66                             | 12.99 | 1259.33                              | 1.76 |

Table represents the mean ± SEM body length after designated hours of attaining stage L4. The body length has been measured in µm.
